# Supplementary material for: 3D intrusions transport active surface microbial assemblages to the dark ocean
Source: PubMed Central journal article supplement — Proc Natl Acad Sci U S A. 2024 May 2;121(19):e2319937121. doi: 10.1073/pnas.2319937121 (PMC11087786; doi:10.1073/pnas.2319937121), 2024-05-02
Supplement: pnas.2319937121.sapp.pdf [file pnas.2319937121.sapp.pdf]

# PNAS



1

## 2 **Supporting Information for**

### 3 **3D-intrusions transport active surface microbial assemblages to the dark ocean**

4 **Mara A. Freilich et al.**

5 **Corresponding authors: Mara Freilich, Amala Mahadevan and Alexandra Z. Worden.**

6 **E-mail: [mara\\_freilich@brown.edu](mailto:mara_freilich@brown.edu), [amala@whoi.edu](mailto:amala@whoi.edu), and [azworden@mbl.edu](mailto:azworden@mbl.edu)**

#### 7 **This PDF file includes:**

8 Supporting text

9 Figs. S1 to S16

10 Table S1

11 SI References

## 12 Supporting Information Text

13 **Water mass structure.** There are three typical water masses in the Alborán Sea, which are characterized by their temperature  
14 and salinity properties on a given density surface. The Atlantic water is relatively fresh and cool, the Mediterranean water  
15 is relatively warm and salty and the Modified Atlantic Water lies between those two water masses in temperature-salinity  
16 space (1). All three water masses were sampled during the field campaigns presented in this manuscript. The sampling during  
17 IRENE (July 2017) was in the Mediterranean water and Atlantic water. During the other two field campaigns, sampling was in  
18 the Modified Atlantic Water and the Atlantic water (Fig. S1). During the stratified sampling periods (July 2017 - IRENE and  
19 May-June 2018 - CLP18), the surface water was much warmer than the interior, inhibiting water mass exchange.

20 **Depth distribution of biomass.** Advective export occurs due to the co-occurrence of biomass and downward vertical water mass  
21 transport. Therefore, the depth distribution of both the community and the vertical velocity play a key role in determining  
22 the total flux and the community composition of the flux. The average vertical profiles of cyanobacteria, picoeukaryotes, and  
23 non-photosynthetic bacteria differ between the research cruises due to regional and seasonal variability (Figure S2). During the  
24 July 2017 research cruise in the oligotrophic Mediterranean water, *Prochlorococcus* was abundant and had peak biomass in the  
25 Atlantic water mass DCM near 40 m depth. Low-light *Prochlorococcus* also peaked in the Mediterranean water DCM near 70 m  
26 depth. By contrast, *Prochlorococcus* was in low abundance during the spring and early summer. Instead, *Synechococcus* and  
27 picoeukaryotes had high abundance in the chlorophyll maximum layer, which was in the surface mixed layer in March-April  
28 2019 and deeper during May-June 2018 and July 2017. Note that the maximum photosynthetic biomass was, on average,  
29 deeper (at approximately 60 m) during May-June 2018 than in July 2017. However, during the research cruise in July 2017,  
30 the DCM on the Atlantic water mass side of the front was much shallower and had higher POC, which dominated the average  
31 profile, as compared to the Mediterranean side of the front, which was the source of the intrusion communities.

32 The biomass and chlorophyll maxima were coincident in the observed profiles (Fig. S3), as has been reported previously in  
33 this region (2).

34 **Cell fluorescence.** We find limited deviations in average chlorophyll *a* fluorescence per cell measured from flow cytometry  
35 in aphotic chlorophyll maxima (ACMs) compared with similar water masses from the photic zone, suggesting that there is  
36 limited photoacclimation and that the enhanced chlorophyll is not explained by photoacclimation (Fig. S4). We measure the  
37 average red (692 nm) and orange (572 nm) fluorescence of each taxonomic group using the influx flow cytometer (Materials  
38 and Methods). For a few of the intrusion (ACM) samples, some cells, particularly *Synechococcus*, display an increase in the  
39 average cell fluorescence beyond that of shallower or deeper communities. However, most of the intrusion (ACM) samples that  
40 are analyzed have cell fluorescence that is consistent with the surrounding communities, or the communities that are found  
41 shallower than the intrusion samples (Fig. S4).

42 **Case study of early spring physical export.** The transects observed during March–April 2019 demonstrate that physically-driven  
43 export into the pycnocline takes place throughout the year, even when most of the photosynthetic biomass is in the surface  
44 mixed layer. This not only reveals that frontal dynamics can export carbon throughout the year, but also that water mass  
45 transport can occur from the base of the mixed layer to below the depth of the winter mixed layer (3). While we observed that  
46 the community composition was not as strongly differentiated between the Atlantic Water and Modified Atlantic Water as it  
47 was between the Atlantic water and Mediterranean water, we were still able to observe anomalous biological communities at  
48 depth. These communities were anomalous in both the total abundance of plankton and the composition of the biological  
49 community relative to the surrounding water at the same depth. What is particularly notable is that the inversions in AOU  
50 and temperature were associated with inversions in biomass. For example, Fig. S5 at 53 km shows that the deeper sample  
51 that was within the intrusion had higher biomass even though it was outside the euphotic layer than the shallower sample  
52 outside the intrusion. In addition, the intrusion has a high abundance of high light *Prochlorococcus*, which is not expected to  
53 grow at the depths below 100 m where it was observed. By contrast, in the denser water outside of the intrusion a low light  
54 *Prochlorococcus* ecotype is observed.

55 On the transect plotted in Fig. S5 we measured the photosystem II efficiency of the cells (measured as  $F_v/F_m$ ) and found  
56 that along an intrusion, it decreases from 0.42 at 50 m to 0.29 at 75 m, and to 0.19 at 100 m, even as the phytoplankton  
57 community composition changes little, suggesting that the phytoplankton cells are stressed (4). The photosystem II efficiency  
58 ( $F_v/F_m$ ) of algae was assessed by examining the changes in chlorophyll fluorescence with the electron transport inhibitor  
59 3-(3,4-dichlorophenyl)-1,1-dimethylurea (DCMU) that blocks electron transport at the electron acceptor Q in PSII (5). Minimum  
60 and maximum fluorescence were measured after 30 min of dark adaptation using a Turner Designs 10-AU fluorometer on board.  
61 Studying the changes in the photosynthetic community composition along intrusions may reveal mortality processes.

62 **Biogeochemical contrasts in intrusions.** The intrusions have significantly higher POC and lower AOU than the background.  
63 The magnitude of this difference varies between the research cruises likely due to differences in the ecology and biogeochemistry  
64 regionally and over time (Table S1).

65 **Comparison between methods for estimating POC.**

66 **Backscatter and beam transmission.** In the northwestern Mediterranean, the diel cycles of beam transmission  $c_p$  and backscatter  
67  $b_{bp}(700)$  have been observed to show only weak correlation indicating that there are differential contributions of phytoplankton  
68 to these proxies (6).  $c_p$  shows larger diel variations (7) suggesting that small detritus and bacteria make larger contributions to  
69  $b_{bp}$  than to  $c_p$ . At calibration casts where the EcoCTD is attached to the ship-board CTD frame, we find a linear correlation  
70 between  $c_p$  and  $b_{bp}(700)$  (Fig. S6).

71 **Flow cytometry and beam transmission.** A comparison of the quantification of POC from flow cytometry and the transmissometer  
72 reveals good agreement and useful differences (Fig. S7). There is a strong correlation between POC estimated from flow  
73 cytometry and POC estimated using the transmissometer. This indicates that the microbial communities play a key role  
74 in the variability of POC. However, the transmissometer estimates are approximately twice as large as the estimates from  
75 flow cytometry during CLP19, and larger by a greater factor during CLP18. The slope in log-log space is 1:1 for the CLP19  
76 samples, steeper than 1:1 for CLP18 transect 1 samples, and shallower than 1:1 for CLP18 transect 2 samples. Where the  
77 slope is 1:1, we can infer that the additional biomass captured by the transmissometer is likely detritus and heterotrophic  
78 eukaryotes. Where the slope is not 1:1, we may infer that the biomass conversions have systematic errors. In the case of the  
79 estimates from flow cytometry, this may indicate that the eukaryotes are smaller (shallower slope than 1:1) or larger (steeper  
80 slope than 1:1) than estimated for the conversion from cell counts to biomass (see section Eukaryotic community composition).  
81 Alternatively, the transmissometer may systematically over (steeper) or under (shallower) estimate the POC concentration at  
82 high concentrations due to patchiness in the community composition.

83 Interpreting results from flow cytometry alone allows us to focus on the impacts of physical processes on the export of small  
84 intact cells, while use of the transmissometer reveals the net impact on POC export, including detritus and large organisms  
85 that may settle more quickly or perform diel vertical migration.

86 **Eukaryotic community composition.** There is more variability in the cell size and cellular carbon content of eukaryotes than bacteria.  
87 This makes estimation of the POC from cell enumeration more uncertain when the communities are dominated by eukaryotes.  
88 Furthermore, we focus on the role of the intrusion process in the export of small cells. Therefore, it is important to verify that  
89 the intrusion communities are composed of small cells, even when Eukaryotes are numerically dominant.

90 In agreement with the general trend of increasing cell abundance with decreasing cell size, we find that samples with a large  
91 number of Eukaryotes are dominated by relatively small cells, as estimated by FALS (forward angle light scattering), and  
92 Viridiplantae amplicons, which tend to be smaller than Stramenopiles, the other dominant group identified from plastids (Fig.  
93 S8). The variation in average FALS between 200 and 400 results in a factor of 2.5 difference in estimates of carbon per cell  
94 assuming a cell size conversion of  $\frac{\text{size cell}}{\text{size beads}} = \frac{\text{FALS cells}^x}{\text{FALS beads}}$  where  $x$  is between 4 and 6 and  $\log C$  (pg/cell) =  $0.94 \times \log \text{Vol} - 0.6$   
95 where volume is in units  $\mu\text{m}^{-3}$  (8).

96 **Microbial diversity.** Rarefaction curves are used to examine the influence of sequencing depth on the estimation of the microbial  
97 community composition. The lack of saturation of the curves indicates the sequencing depth precludes analysis of rare taxa  
98 (Fig. S9).

99 **Flow cytometry gating strategy.** Figures exemplifying the gating strategy for photosynthetic and heterotrophic microbes are  
100 shown in Figures S15 and S16.

101 **Eddy flux parameterization.** To approximate the global magnitude of POC export due to the intrusion process described in this  
102 paper, we parameterize the vertical flux using a skew flux (9, 10) as

$$103 \quad \overline{w' C'} = \kappa (2S \cdot \nabla_h \overline{C} + S^2 \overline{C_z}), \quad [1]$$

104 where  $w$  is the vertical velocity,  $C$  is the POC concentration, and  $S$  is the isopycnal slope.  $C'$  and  $w'$  are anomalies from the  
105 area average. The isopycnal slope is a 2D vector and is computed from a monthly Argo climatology (11). The isopycnal slope  
106 term in this expression accounts for the effect of a limited depth range of sloping isopycnal surfaces. The flux will go to zero if  
107 an isopycnal is flat. We use an eddy transfer coefficient given by  $\kappa = \alpha \frac{M^2}{N} l^2$ . This eddy transfer coefficient was derived by  
108 Visbeck et al. (10) based on linear stability analysis of baroclinic eddies. The transfer coefficient, which has units of  $\text{m}^2 \text{s}^{-1}$ , is  
109 given by an eddy velocity multiplied by a mixing length ( $l$ ). The eddy velocity is determined to be  $\alpha Ri^{-1/2} fl$  where  $Ri$  is the  
110 Richardson number. The balance Richardson number can be approximated as  $Ri^{-1/2} = \frac{M^2}{Nf}$ . It is notable that the coefficient  
111  $\alpha Ri^{-1/2}$  is the scaling derived by Freilich and Mahadevan (12) for the proportion of the vertical motion that is along sloping  
112 isopycnal surfaces, which further supports the use of this scaling for the vertical eddy flux. We use the constant  $\alpha = 0.015$  as in  
113 (10). The coefficient  $\alpha \frac{M^2}{N}$  is computed from a monthly climatology of Argo profiles (11, 13). We quantify the mixing length  
114 from the variance of salinity ( $\Pi$ ) on an isopycnal surface as  $l = \frac{\langle \Pi' \Pi' \rangle^{1/2}}{\langle |\nabla \Pi| \rangle}$  where  $\Pi' = \Pi - \overline{\Pi}$  after Cole et al. 2015 (14). All  
115 gradients and the mixing length are computed on a 1-degree grid using Argo data. A single annual value is used for the mixing  
116 length and monthly values are used for  $\alpha \frac{M^2}{N}$ . The average values are shown in Fig. S10.

117 Coverage of observations of direct measurements of POC and optical proxies of POC are limited globally, resulting in a  
118 relatively high error in the POC magnitude and POC gradients compared to the other quantities. While the results presented  
119 here suggest that POC flux from the base of the euphotic zone could be important, the global generalization is limited by the  
120 data availability. The global distribution of optical backscatter observations used in training the algorithm is shown in figure

121 4 of Sauzede et al. 2021 and displays a bias in the density of observations in the Southern Ocean, Mediterranean Sea, and  
122 North Atlantic and very few observations in the low latitude subtropics (15), highlighting the need to expand observations of  
123 subsurface biological distributions and communities.

124 This parameterization for the vertical flux is based on mid-latitude baroclinic instability and is limited in its application to  
125 equatorial regions, where a parameterization based on the density gradients does not capture the full scaling relationship in  
126 Freilich and Mahadevan 2019 (12) and where the eddy velocity inferred by  $\alpha Ri^{-1/2}$  is small while the eddy kinetic energy in  
127 models is large. Therefore, these regions are excluded from the analysis. This parameterization can only be applied below the  
128 mixed layer and represents mesoscale and large submesoscale processes. It differs from the one used by Omand et al. (16),  
129 which only parameterizes the impact of mixed layer eddies. A recent study in the North Atlantic, Spingys et al. (17), used  
130 similar reasoning to quantify the advective flux of nutrients and found a similar order of magnitude of nutrient flux as we  
131 obtain for the carbon flux, assuming approximate Redfield ratio conversions between nutrients and carbon.

### 132 **Modeling frontal dynamics.**

133 **POC flux.** The POC flux averaged over a frontal region is computed using process study models initialized with hydrographic  
134 structure from observations in the Western Mediterranean Sea. Two models are run with one representing the stratified period  
135 (when the initial condition was sampled) and the other the springtime period when the thermocline density surfaces outcrop at  
136 the sea surface (18). The initial condition representing the springtime period is obtained by cooling the sea surface and using  
137 convective adjustment until the mixed layer has a maximum depth of 70 m. The model has an idealized configuration with  
138 no bottom topography. It is a re-entrant channel configuration with closed boundaries in the north and south and periodic  
139 boundaries in the east-west direction. The model horizontal resolution is 500 m, except near the closed north and south walls  
140 where the cell length increases linearly to 2 km. The model is evolved with a horizontal diffusivity of  $1 \text{ m}^2 \text{ s}^{-1}$  and a vertical  
141 diffusivity of  $10^{-5} \text{ m}^2 \text{ s}^{-1}$ . The POC flux is computed by evolving the mean POC profile from each season for a month with no  
142 reactions or restoring. The total POC flux is estimated as the average carbon concentration integrated between the model base  
143 and 90 m (Fig. S11).

144 **3D structure of POC intrusions.** While intrusions are identified in cross-frontal transects in the present work, they are three-  
145 dimensional features that are advected along the front. The shape of the intrusions evolve as they are advected. In a  
146 two-dimensional slice an intrusion may appear across a wide density range (19). In the case of the features identified here,  
147 because the intrusions originate from a frontal region where, by definition, there is a large range of density over the relatively  
148 small origin location, we expect intrusions to occur across a wide range of density. Furthermore, we find that there is not an  
149 exact correspondence between biogeochemical and thermohaline intrusions. This is because biogeochemical and thermohaline  
150 gradients differ in both the vertical and horizontal.

151 We examine the shape of subducted features in the model, which allows us to propose 3D structures of POC intrusions  
152 and examine their temporal evolution. Due to the along-front current, water parcels are moving more quickly along-front  
153 than either downwards or across the front. Model analysis shows that water parcels come from 25–100 km upstream of the  
154 location where they are observed subsurface (Fig. S12). In two process study models with the same thermocline density  
155 structure but distinct near surface stratification (one stratified as in July 2017 and one with 50-70 m deep mixed layers as in  
156 March-April 2019), there is a positive relationship between lateral and vertical displacement of water parcels that subduct  
157 within the thermocline that corresponds approximately to the isopycnal slope in the thermocline (Fig. S12B,C). Water parcels  
158 that are deeper have traveled farther from their origin location both in the horizontal and vertical with the ratio of those  
159 two motions set by the isopycnal slope. In these models, the water parcels that originate within the thermocline experience  
160 subduction along a well-defined isopycnal surface and their motions show the signature of the mesoscale meander (20). The  
161 relationship between vertical and lateral motions is less coherent for water parcels that subduct from the mixed layer where the  
162 isopycnal slope is less well-defined and there is a greater influence of submesoscale processes (Fig. S12D; (3)).

163 **Observations at the Bermuda Atlantic Time Series.** Given the limitations in estimating the POC flux globally from observations,  
164 we demonstrate the relevance of this export process in other regions by observing that ACMs are ubiquitous in the subtropical  
165 gyres. For example, at the Bermuda Atlantic Time Series, ACMs are present below 200 meters in over 5% of the monthly  
166 profiles in the late spring (Fig. S13).

167 While the density of the mixed layer varies throughout the year, the density of the chlorophyll maximum layer is approximately  
168 constant at BATS from the onset of stratification in March to April until the mixed layer deepens (and becomes denser) in the  
169 fall. During the stratified period, ACMs are generated from the base of the DCM, as indicated by the ACMs lying within the  
170 DCM density range, but with a slightly higher average seawater density. There is a distinct seasonality to ACM occurrence,  
171 with ACMs occurring more frequently in the late spring and early summer, before the mixed layer begins to deepen.

172 **Depth range of subduction.** Export by intrusions has a distinct vertical profile from sinking flux (Fig. 10). Advective subduction  
173 is constrained to occur along sloping density surfaces. This means that the maximum depth to which subduction occurs is  
174 determined by the density structure of the region where subduction occurs. While our observations are from fronts concentrated  
175 in the upper 200 m, in the open ocean, eddy effects can extend below 1000 m (21) and density surfaces that outcrop in the  
176 photic zone can extend downwards hundreds of meters (Fig. 13). We introduce the concept of “potential displacement” to  
177 quantify the depth influence of subduction. Subduction can occur along a given isopycnal surface only within the depth range  
178 of that isopycnal surface. In depth-density plots, this depth range can be diagnosed. For example, near BATS, water parcels

179 on the  $\sigma = 26.25$  surface can subduct 300 m from 100 m to 400 m and water parcels on the  $\sigma = 26.35$  surface can subduct  
180 450 m from 100 m to 550 m (Fig. S14). The density variation at a given depth, particularly in the upper ocean, reflects  
181 both large scale gradients and eddy dynamics. In this region near BATS, the density variations are due to eddy dynamics  
182 and do not display large scale gradients. While potential displacement can be quantified from hydrography alone, the actual  
183 displacement depends on the ageostrophic velocities. The depth over which advective export fluxes attenuate depends not just  
184 on the remineralization rate, as it does for sinking flux, but also on the vertical structure of the vertical motion.

185 Carbon may be exported deeper than would be possible by subduction alone through a combination of subduction and  
186 sinking or mixing (22).

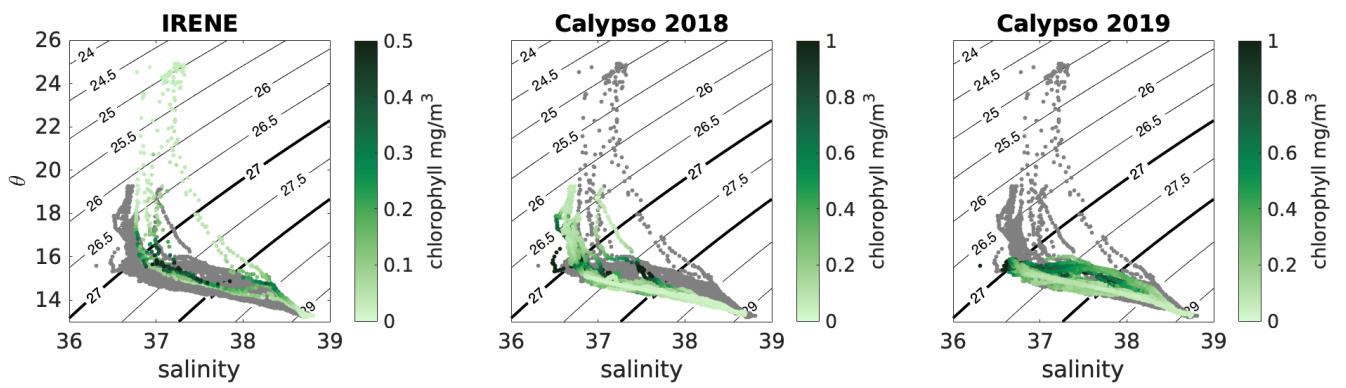

**Fig. S1.** Temperature-salinity diagrams showing the water mass structure in the Alborán Sea. Contours are density. The gray points are repeated on each panel and show the water mass structure sampled by CTD casts over the three field campaigns. Chlorophyll concentration is plotted in temperature-salinity space for each field campaign. The branches in temperature salinity space show the water masses. The chlorophyll maximum is on a different density surface in each water mass, reflecting the variable nutrient-density relationship.

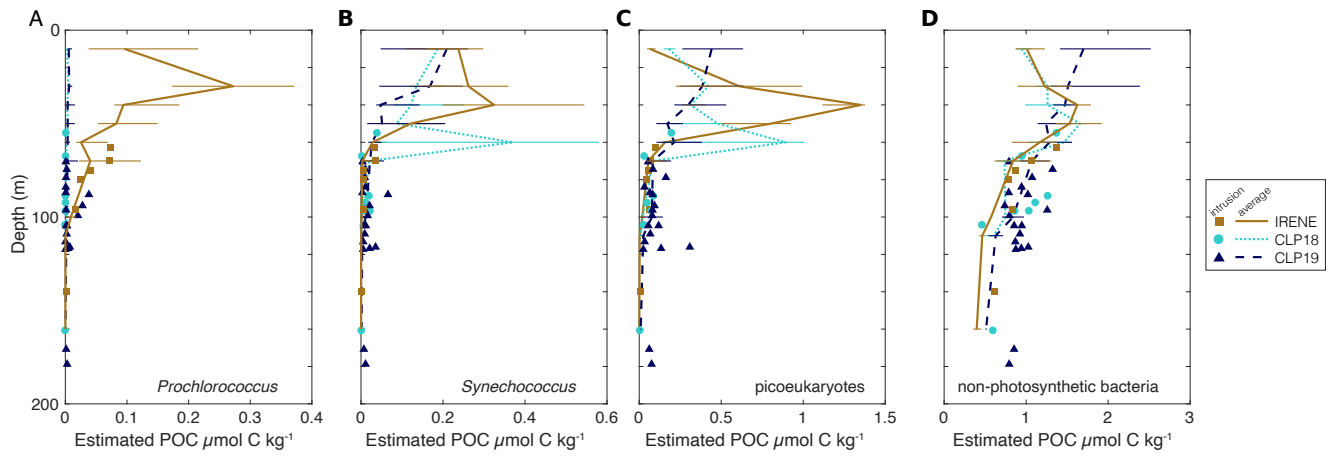

**Fig. S2.** Average profiles of plankton estimated by enumerating cells with flow cytometry and using taxa-specific cell to biomass conversions. The solid line shows the median in depth bins, the error bars show the interquartile range. The points indicate the concentration of each group in the intrusions. The samples are grouped by research cruise.

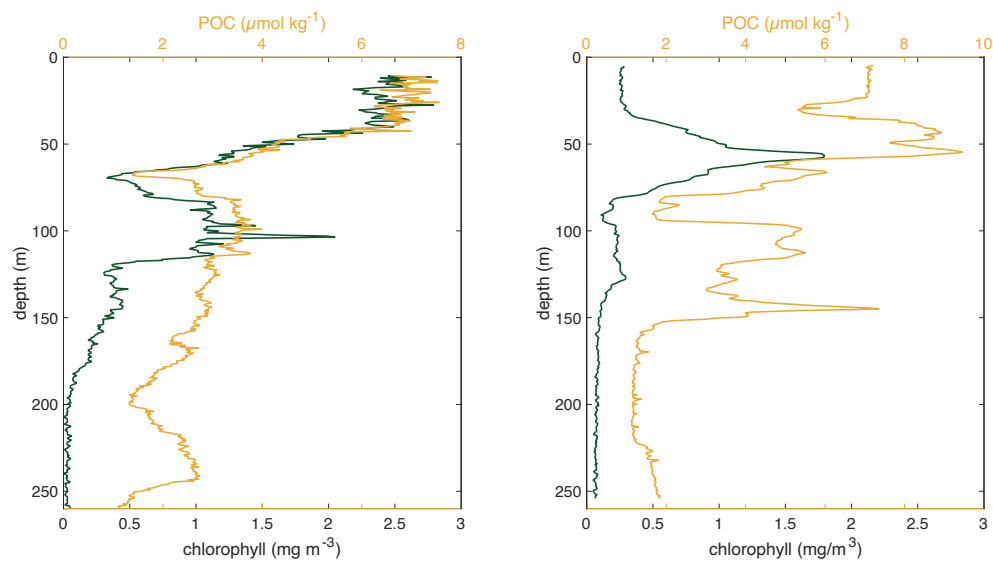

**Fig. S3.** Chlorophyll and POC profiles for the same profiles shown in main text Figure 1b,c demonstrate that chlorophyll and POC have coincident maxima. In this figure, POC is estimated using observations from a transmissometer.



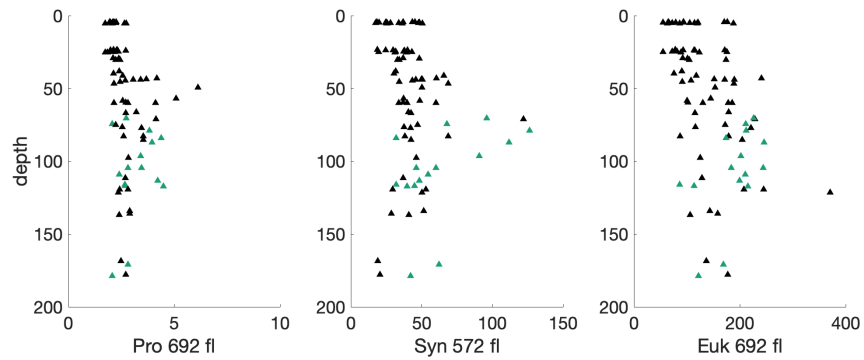

**Fig. S4.** Average fluorescence of the cells observed during CLP19 normalized by yellow-green and rainbow beads in each taxonomic group, *Prochlorococcus*, *Synechococcus*, and picoeukaryotes as a function of depth. The *Prochlorococcus* and picoeukaryotes fluorescence is chlorophyll-a fluorescence while the *Synechococcus* fluorescence is phycoerythrin fluorescence. The green symbols show samples from intrusions.

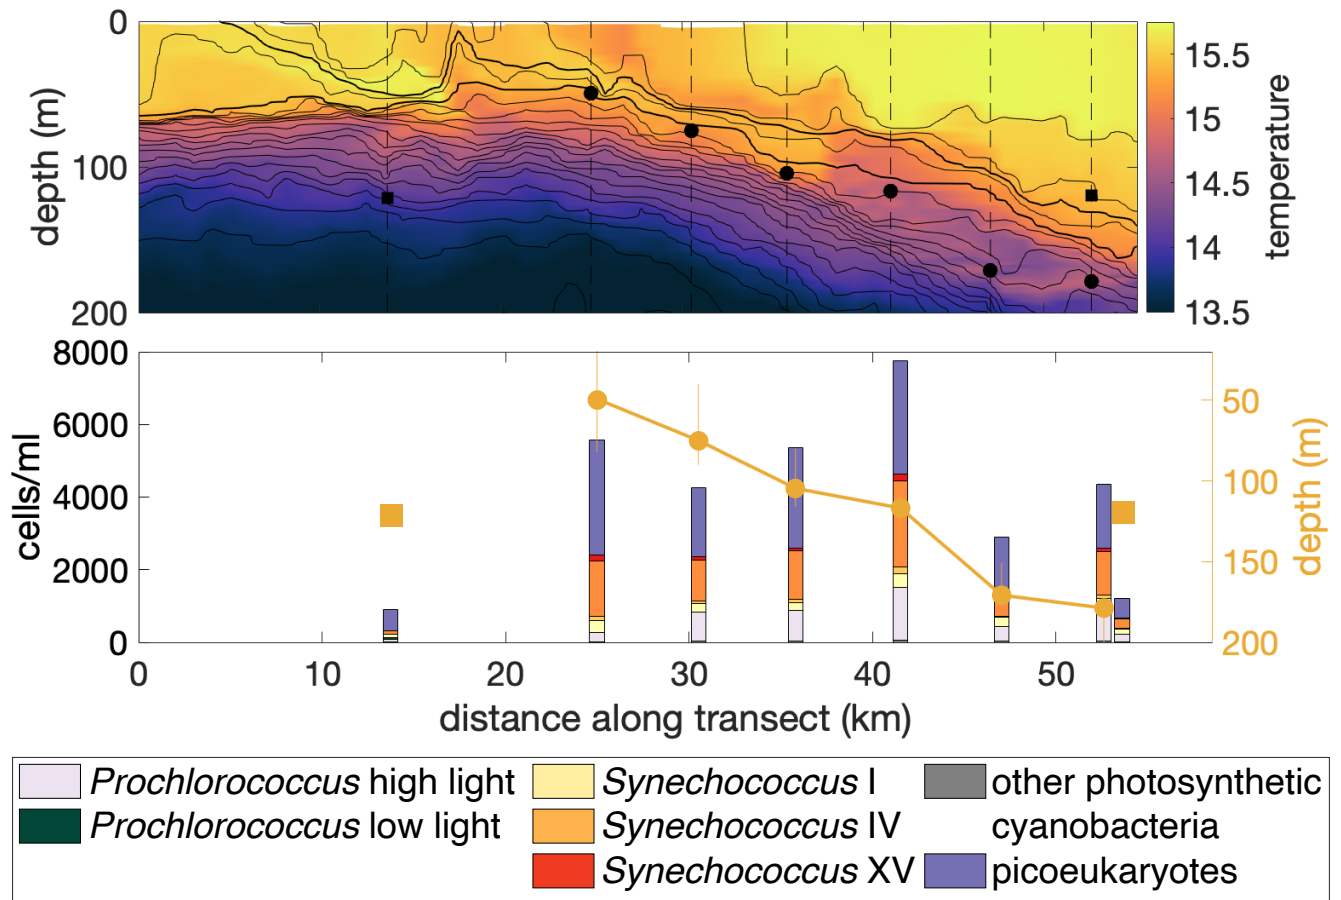

**Fig. S5.** Upper panel: Example 2D section across the western Alborán Gyre (transect C2). Temperature measured by the UCTD (in color) is overlaid with potential density (contours). The locations of CTD casts are shown in dashed lines. Selected water sample locations (black symbols) are shown to compare and contrast the community composition within (filled circles) and outside (filled squares) the intrusion on this transect. The cast at 36 km is shown in main text Fig. 1B. Lower panel: Community composition at selected sampling locations, combining cell counts (left axis) from flow cytometry and 16S rRNA gene amplicon sequencing. The depth of the samples (right axis) is shown by the orange points. The intrusion samples are circles and are connected by a solid line.

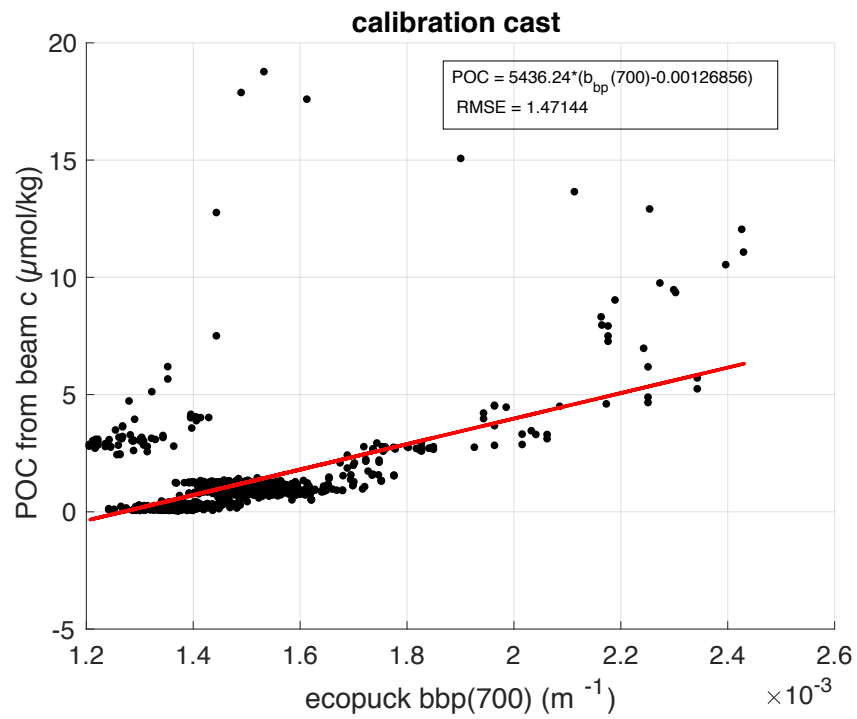

**Fig. S6.** Correlation between POC estimated from the transmissometer mounted to the CTD rosette and from bbp(700) measured by the EcoCTD during a calibration cast where the EcoCTD was attached to the CTD rosette frame.

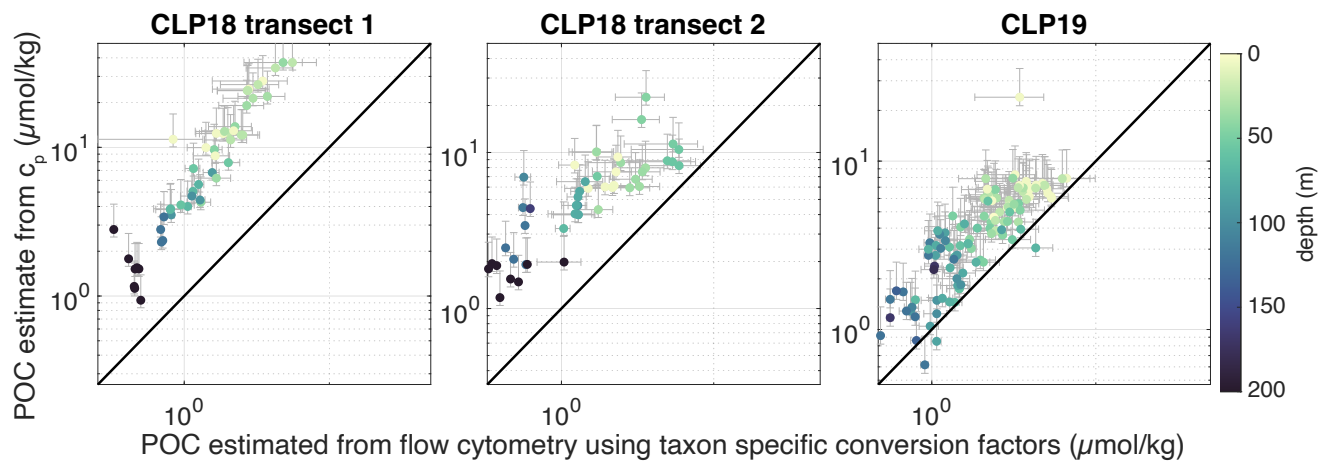

**Fig. S7.** Comparison of estimates of POC concentration from flow cytometry (FCM) and transmissometer ( $c_p$ ). Transects 1 and 2 from CLP18 (transects B1 and B2, respectively) are plotted separately because they display different slopes. All samples from CLP19 are plotted together. IRENE is not shown because there is no estimate of POC from a transmissometer during IRENE. The error bars show uncertainty due to conversion factors from beam transmission and cell counts to POC.

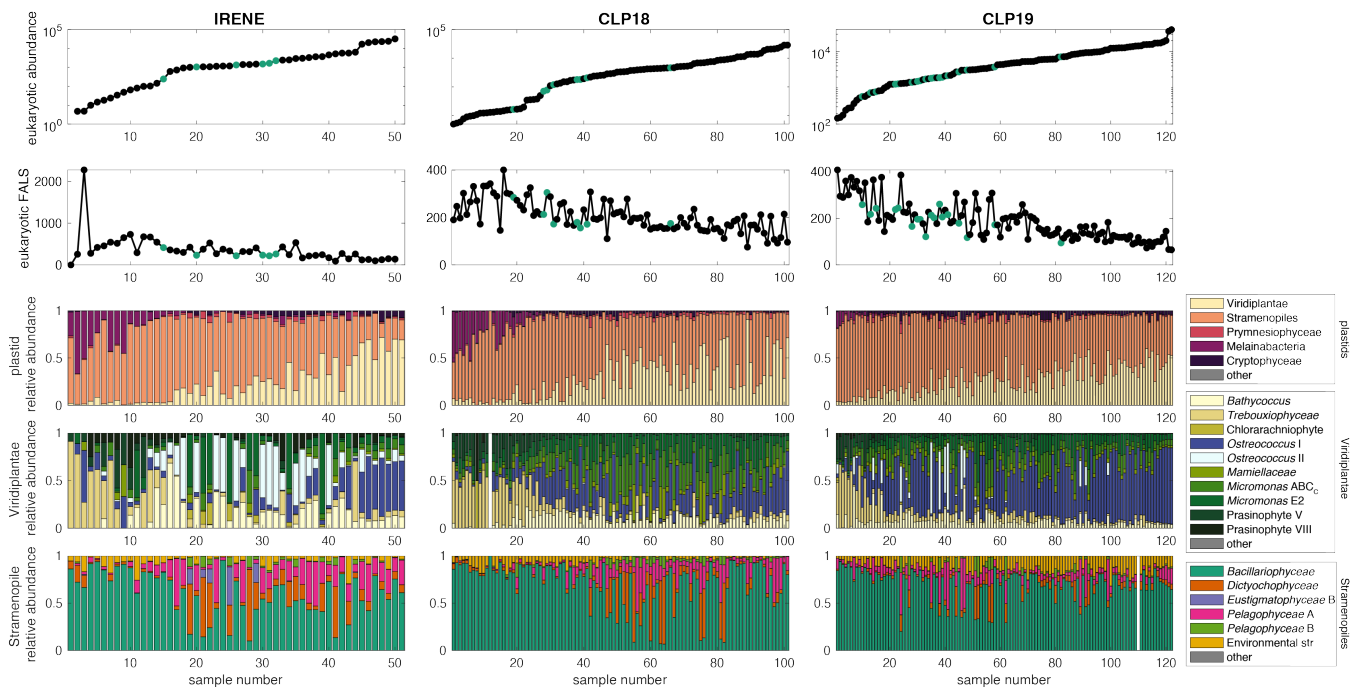

**Fig. S8.** The photosynthetic eukaryote abundance and cell size show systematic variation with the community composition. Samples are arranged in order of ascending abundance of picoeukaryotes, as enumerated by flow cytometry. Each column is a different field experiment. The first row shows eukaryote abundance. The second row shows geometric mean forward angle light scatter (FALS), a proxy for cell size. The green dots are intrusion samples. The third to fifth rows show the relative abundance of amplicons in three taxonomic groups: third row, plastids without cyanobacteria; fourth row, Viridiplantae; fifth row, Stramenopiles.

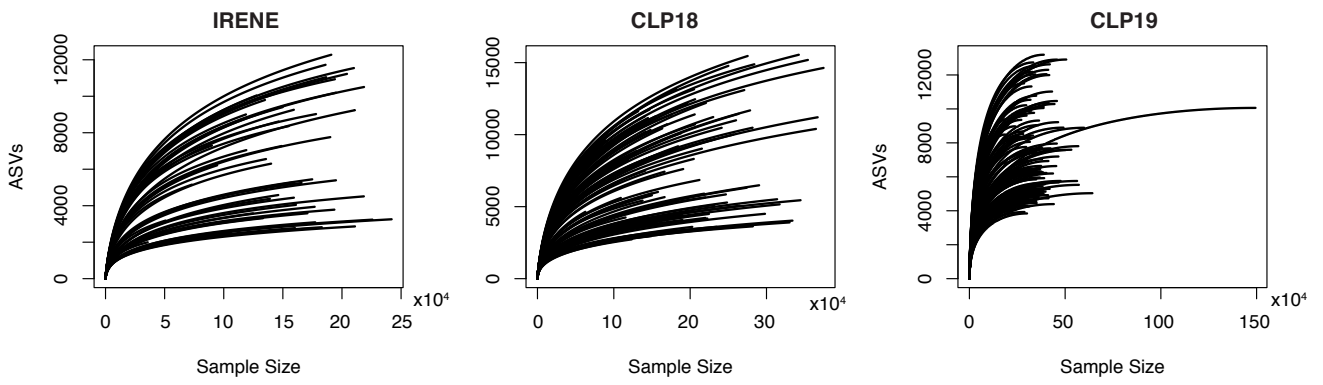

Fig. S9. Rarefaction curves for the three sampling campaigns

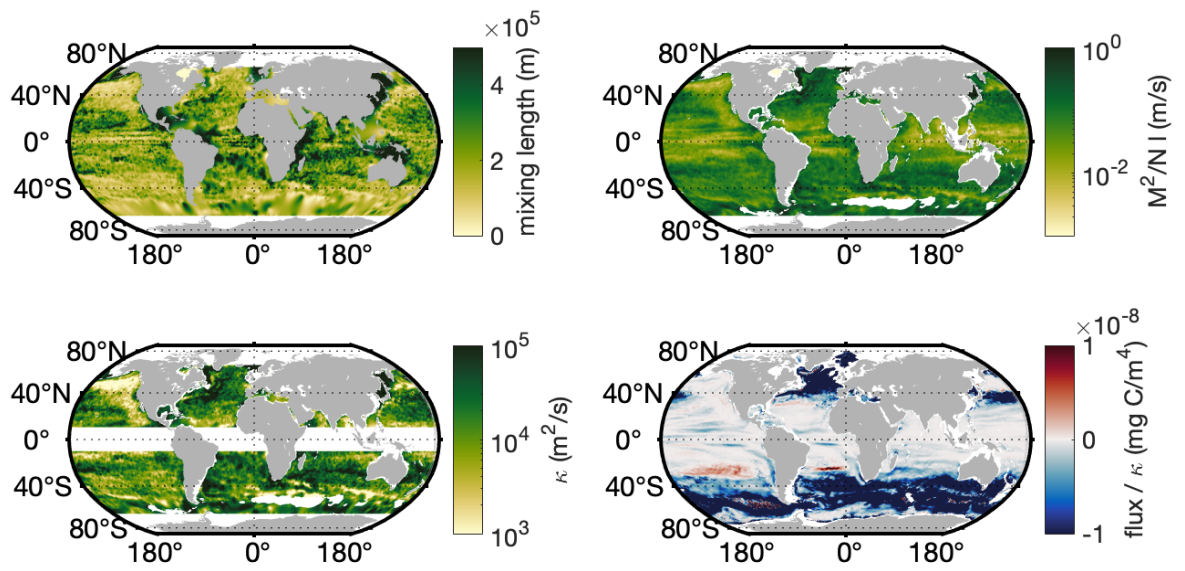

Fig. S10. Components of POC flux calculation

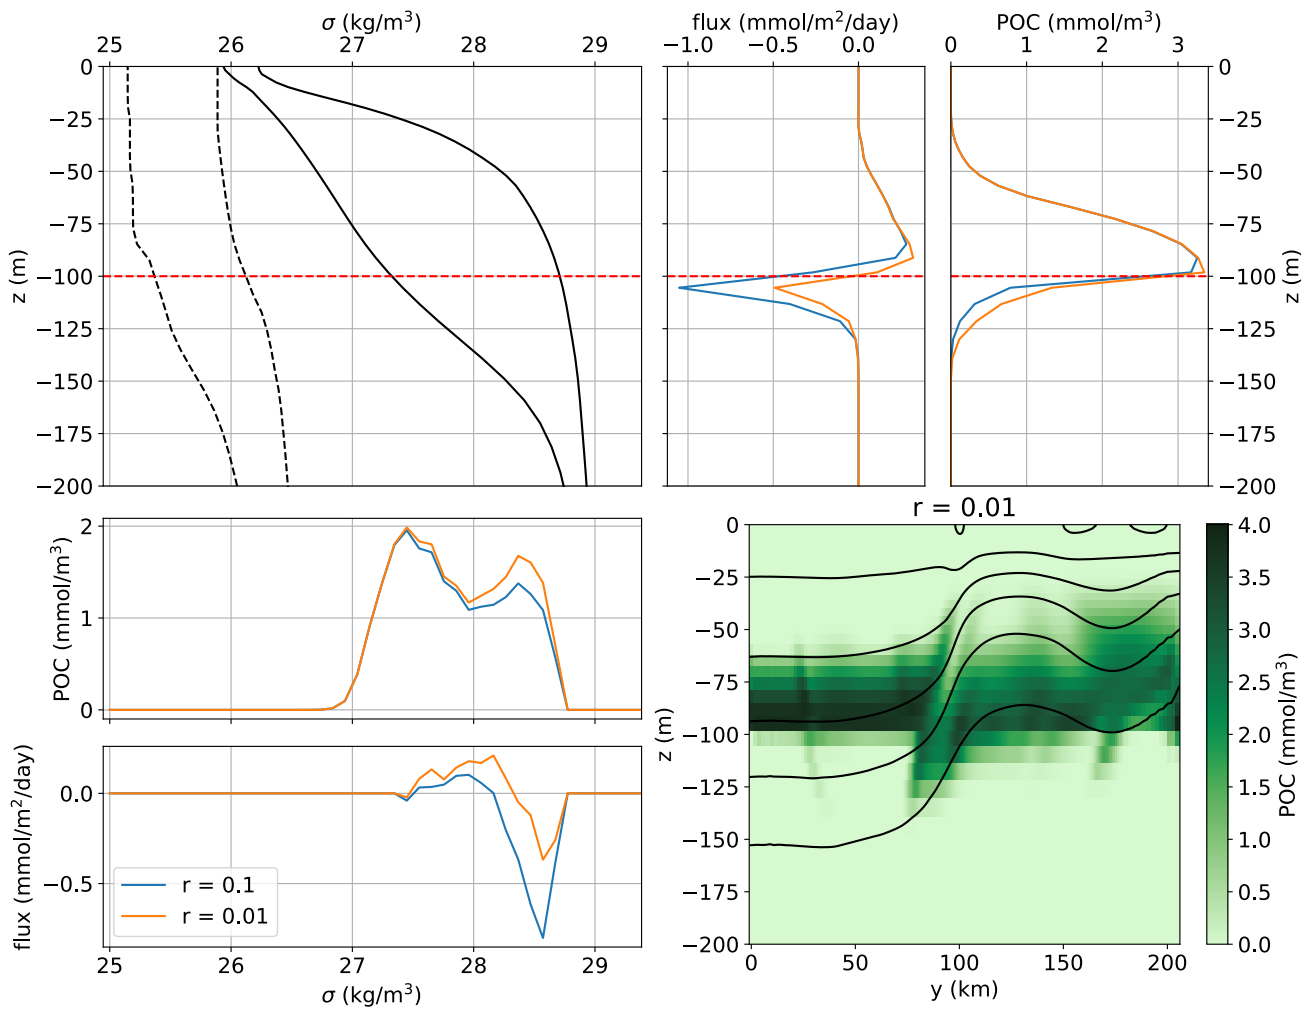

**Fig. S11.** Model POC flux. The flux, computed as  $wP$  where  $P$  is the POC concentration and  $w$  is the vertical velocity, is shown as a function to depth (upper right) and density (lower left). An example model cross section is shown in the lower right for comparison to observations. The upper left panel shows the density range at each depth that are used for model initial conditions. The results in this figure and Fig. S12A-C are from the model with solid lines (stratified period) while the results in Fig. S12D are from the model with dashed lines.



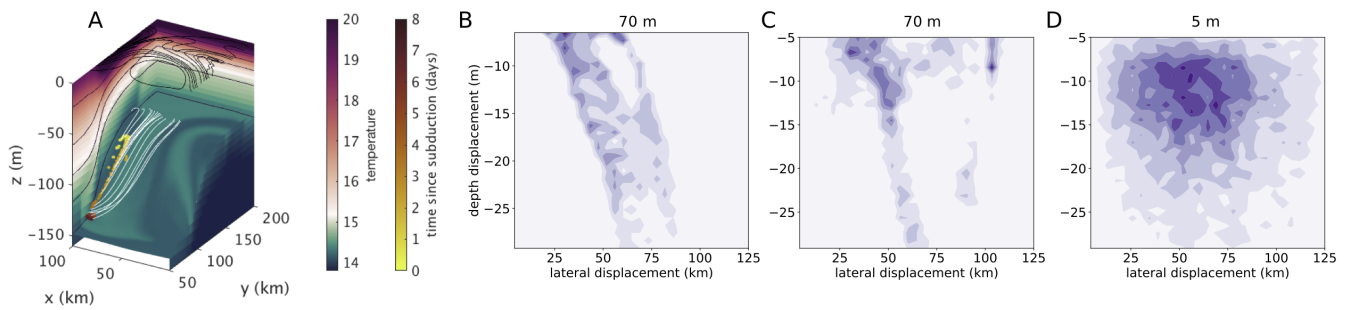

**Fig. S12.** Model analysis of subduction. (A) Lagrangian particles (yellow) originated at 70 m and are subducted along an isopycnal surface. The white trajectories show the x-y-z location history of the particles. The isopycnal surface is shown with temperature shading. Temperature is shown on the boundaries of the frame as well. (B-D) Histograms of the relationship between vertical and lateral displacement of water parcels. (B) Particles initially at 70 m in a model with a stratified surface layer representing the June and July research cruises. The particles shown in panel (A) are a subset of the particles shown in panel B. (C) Particles initially at 70 m in a model with a 50 m deep mixed layer representing the March-April research cruise. (D) Particles initially at 5 m in the model with a 50 m deep mixed layer. Statistics on this plot are from water parcels that leave the mixed layer.

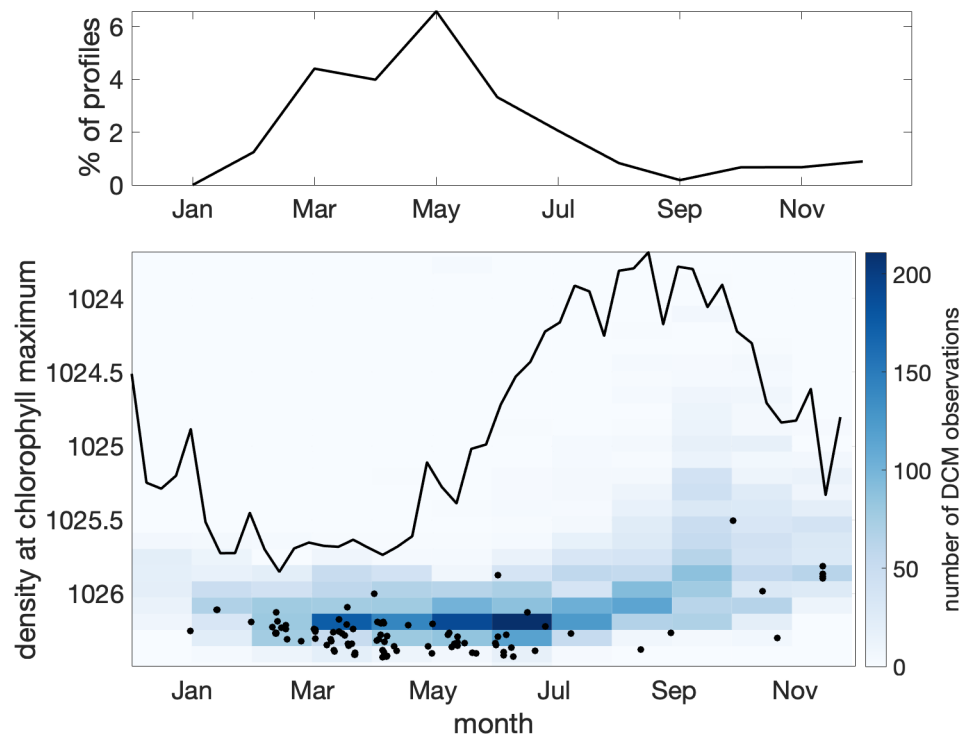

**Fig. S13.** Time series of observations of aphotic chlorophyll maxima at the Bermuda Atlantic Time Series (BATS). The top panel shows the percentage of monthly profiles in which a chlorophyll maximum is observed below 200 meters. The lower panel shows the observations in density space. The background color shows the frequency with which the DCM occurs on a given density surface in a given month. The black line shows the mixed layer density. The black dots show the time and seawater density of aphotic chlorophyll maximum observations.

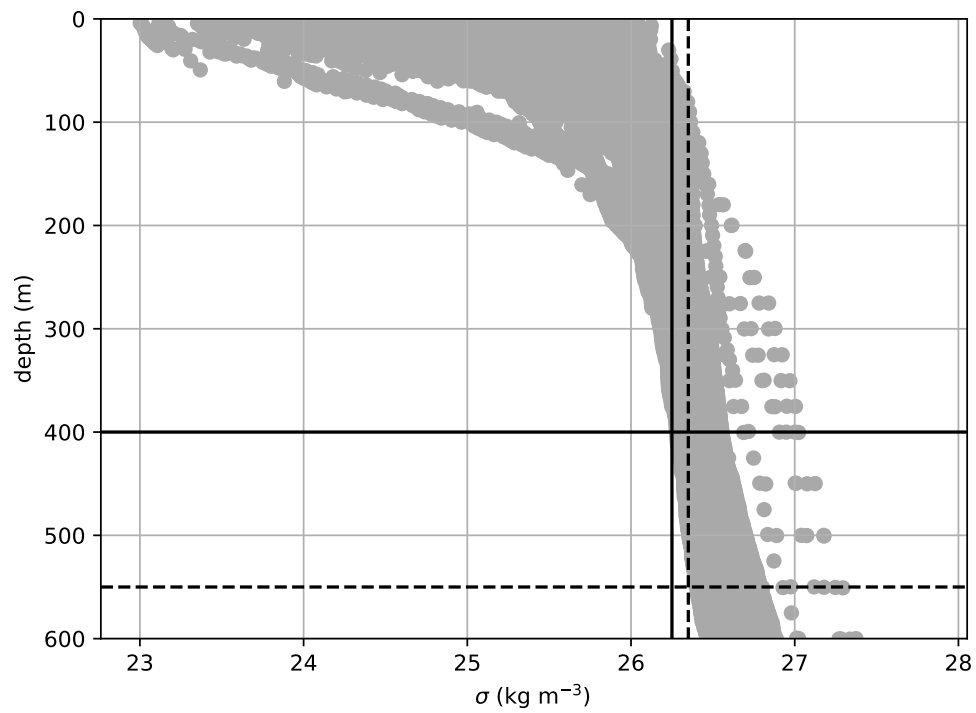

**Fig. S14.** Density as a function of depth from Argo profiles from May to August in a 3-degree box surrounding the Bermuda Atlantic Time Series station. The black lines show the depth range of the 26.25 (solid) and 26.35 (dashed) density surfaces.

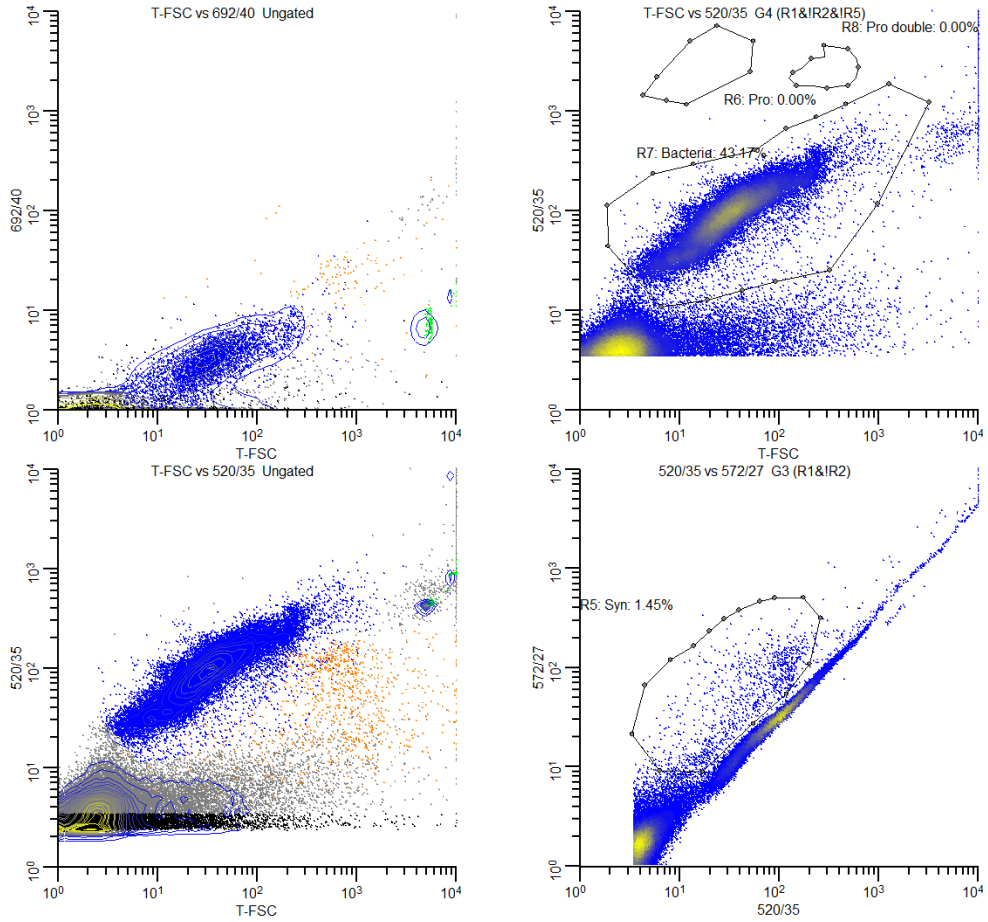

Id1: MAF\_4Sep18\_003.fcs  
 Id2: 12Sep2018

| Id | Alias            | Total  | Region | geoMeanX | StdDevX | geoMeanY | StdDevY |
|----|------------------|--------|--------|----------|---------|----------|---------|
| R2 | YG beads         | 111760 | 894    | 476.99   | 143.69  | 95.07    | 33.40   |
| R3 | YG beads 520 572 | 111760 | 795    | 441.07   | 17.78   | 87.07    | 4.88    |
| R4 | YG FSC 520       | 111760 | 790    | 5306.13  | 297.05  | 440.57   | 15.03   |
| R5 | Syn              | 111760 | 1050   | 42.23    | 48.02   | 47.27    | 55.02   |
| R6 | Pro              | 111760 | 0      | 0.00     | 0.00    | 0.00     | 0.00    |
| R7 | Bacteria         | 111760 | 30865  | 32.59    | 84.94   | 88.82    | 72.10   |
| R8 | Pro double       | 111760 | 0      | 0.00     | 0.00    | 0.00     | 0.00    |

Fig. S15. Example of the gating strategy for stained samples. Bacteria are differentiated from detritus and cyanobacteria.

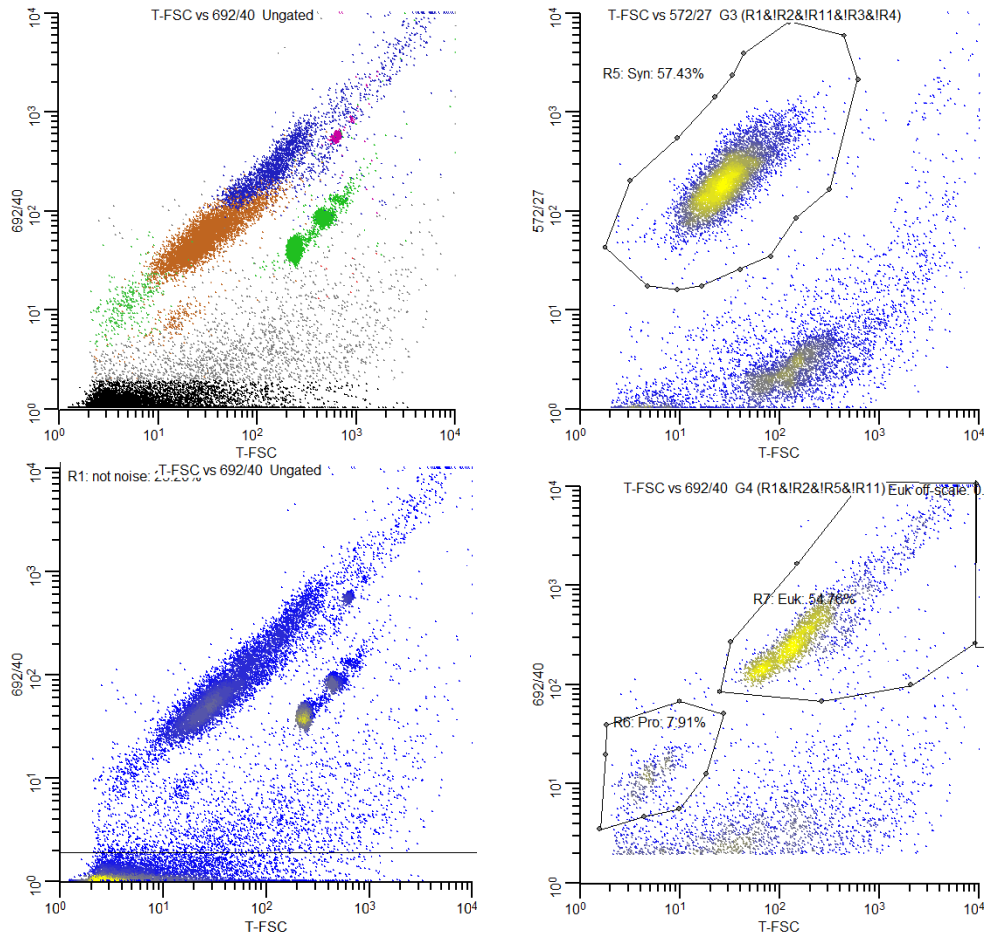

Id1: MAF\_19Apr19\_007.fcs

Id2: 7May2019

| Id  | Alias             | Total  | Region | geoMeanX | StdDevX | geoMeanY | StdDevY |
|-----|-------------------|--------|--------|----------|---------|----------|---------|
| R2  | YG beads          | 139001 | 23274  | 645.98   | 221.74  | 936.36   | 319.69  |
| R3  | YG beads 520 572  | 139001 | 21582  | 615.19   | 31.46   | 889.76   | 45.53   |
| R4  | YG FSC 692        | 139001 | 21508  | 239.58   | 13.39   | 40.53    | 3.95    |
| R5  | Syn               | 139001 | 6515   | 29.82    | 29.95   | 204.92   | 175.45  |
| R6  | Pro               | 139001 | 383    | 5.24     | 2.82    | 11.95    | 7.81    |
| R7  | Euk               | 139001 | 2651   | 209.72   | 984.81  | 353.11   | 1518.46 |
| R10 | Rainbow T-FSC 692 | 139001 | 362    | 630.79   | 36.59   | 563.72   | 34.39   |
| R11 | Rainbow T-FSC 572 | 139001 | 401    | 660.36   | 171.32  | 89.41    | 63.73   |
| R13 | Euk off-scale     | 139001 | 10     | 9922.70  | 232.98  | 6126.09  | 3725.25 |

1 of 1

**Fig. S16.** Flow cytometry gating strategy for photosynthetic populations. The left column shows all data categorized (top) and as a density plot (bottom). *Synechococcus* and beads are gated first (top right) and *Prochlorococcus* and picoeukaryotes are differentiated as on FSC.

| location | POC          |              |            | AOU          |              |            |
|----------|--------------|--------------|------------|--------------|--------------|------------|
|          | intrusions   | background   | difference | intrusions   | background   | difference |
| CLP19    | [2.35, 2.44] | [1.39, 1.48] | 0.9        | [41.9, 43.4] | [46.1, 48.9] | 4.3        |
| CLP18    | [3.27, 3.45] | [1.30, 1.52] | 2          | [56.9, 59.2] | [64.1, 67.8] | 8.4        |

**Table S1. POC concentration ( $\mu\text{mol/kg}$ ) and AOU ( $\mu\text{mol/kg}$ ) in intrusions below 100 m and outside the intrusions (“sampled background”).** The intervals show the bootstrapped 95% confidence interval of the geometric mean of each category (1000 iterations). The concentration outside the intrusions is calculated by averaging the POC and AOU concentration from a random sample of points with the sample depth distribution as the intrusion samples. The variation in the geometric mean and the confidence intervals among random samples from the background is less than 0.001  $\mu\text{mol/kg}$ . The location is the research cruise and region. CLP19 WAG is transects C1–5. CLP18 is transects B1 and B2. The t-test p value that the geometric mean in the intrusions is significantly different from the sampled background is less than 0.001 in all cases.

187 **References**

- 188 1. Á Viúdez, RL Haney, J Tintoré, Circulation in the Alboran Sea as Determined by Quasi-Synoptic Hydrographic  
189 Observations. Part II: Mesoscale Ageostrophic Motion Diagnosed through Density Dynamical Assimilation. *J. Phys.*  
190 *Oceanogr.* **26**, 706–724 (1996).
- 191 2. E Marañón, et al., Deep maxima of phytoplankton biomass, primary production and bacterial production in the  
192 Mediterranean Sea. *Biogeosciences* **18**, 1749–1767 (2021).
- 193 3. M Freilich, A Mahadevan, Coherent Pathways for Subduction From the Surface Mixed Layer at Ocean Fronts. *J. Geophys.*  
194 *Res. Ocean.* **126**, e2020JC017042 (2021).
- 195 4. E Alou-Font, S Roy, S Agustí, M Gosselin, Cell viability, pigments and photosynthetic performance of Arctic phytoplankton  
196 in contrasting ice-covered and open-water conditions during the spring-summer transition. *Mar. Ecol. Prog. Ser.* **543**,  
197 89–106 (2016).
- 198 5. S Roy, L Legendre, Dcmu-enhanced fluorescence as an index of photosynthetic activity in phytoplankton. *Mar. Biol.* **55**,  
199 93–101 (1979).
- 200 6. M Kheireddine, D Antoine, Diel variability of the beam attenuation and backscattering coefficients in the northwestern  
201 Mediterranean Sea (BOUSSOLE site). *J. Geophys. Res. Ocean.* **119**, 5465–5482 (2014).
- 202 7. P Gernez, D Antoine, Y Huot, Diel cycles of the particulate beam attenuation coefficient under varying trophic conditions  
203 in the northwestern Mediterranean Sea: Observations and modeling. *Limnol. Oceanogr.* **56**, 17–36 (2011).
- 204 8. A Shalapyonok, RJ Olson, LS Shalapyonok, Arabian sea phytoplankton during southwest and northeast monsoons 1995:  
205 composition, size structure and biomass from individual cell properties measured by flow cytometry. *Deep. Sea Res. Part*  
206 *II: Top. Stud. Oceanogr.* **48**, 1231–1261 (2001).
- 207 9. PR Gent, JC McWilliams, Isopycnal mixing in ocean circulation models. *J. Phys. Oceanogr.* **20**, 150–155 (1990).
- 208 10. M Visbeck, J Marshall, T Haine, M Spall, Specification of Eddy Transfer Coefficients in Coarse-Resolution Ocean  
209 Circulation Models. *J. Phys. Oceanogr.* **27**, 381–402 (1997).
- 210 11. F Gaillard, T Reynaud, V Thierry, N Kolodziejczyk, Kv Schuckmann, In Situ–Based Reanalysis of the Global Ocean  
211 Temperature and Salinity with ISAS: Variability of the Heat Content and Steric Height. *J. Clim.* **29**, 1305–1323 (2016).
- 212 12. M Freilich, A Mahadevan, Decomposition of Vertical Velocity for Nutrient Transport in the Upper Ocean. *J. Phys.*  
213 *Oceanogr.* **49** (2019).
- 214 13. Kolodziejczyk, Nicolas, Prigent-Mazella, Annaig, Gaillard, Fabienne, ISAS temperature and salinity gridded fields.,  
215 Technical report (2021).
- 216 14. ST Cole, C Wortham, E Kunze, WB Owens, Eddy stirring and horizontal diffusivity from Argo float observations:  
217 Geographic and depth variability. *Geophys. Res. Lett.* **42**, 3989–3997 (2015).
- 218 15. R. Sauzède, P.R. Renosh, H. Claustre, Global Ocean 3D Particulate Organic Carbon and Chlorophyll-a concentration  
219 Product MULTIOBS\_glo\_bio\_bgc\_3d\_rep\_015\_010, QUALITY INFORMATION DOCUMENT 3 (2021).
- 220 16. MM Omand, et al., Eddy-driven subduction exports particulate organic carbon from the spring bloom. *Science* **348**,  
221 222–225 (2015).
- 222 17. CP Spingys, et al., Observations of nutrient supply by mesoscale eddy stirring and small-scale turbulence in the oligotrophic  
223 north atlantic. *Glob. biogeochemical cycles* **35**, e2021GB007200 (2021).
- 224 18. M Freilich, A Mahadevan, Coherent pathways for subduction from the surface mixed layer at ocean fronts. *J. Geophys.*  
225 *Res. Ocean.* p. e2020JC017042 (2021).
- 226 19. J Woods, R Onken, J Fischer, Thermohaline intrusions created isopycnally at oceanic fronts are inclined to isopycnals.  
227 *Nature* **322**, 446–449 (1986).
- 228 20. AS Bower, A simple kinematic mechanism for mixing fluid parcels across a meandering jet. *J. Phys. Oceanogr.* **21**, 173–180  
229 (1991).
- 230 21. DK Adams, et al., Surface-generated mesoscale eddies transport deep-sea products from hydrothermal vents. *Science* **332**,  
231 580–583 (2011).
- 232 22. M Dever, D Nicholson, MM Omand, A Mahadevan, Size-Differentiated Export Flux in Different Dynamical Regimes in  
233 the Ocean. *Glob. Biogeochem. Cycles* **35**, e2020GB006764 (2021).
